# Supplementary material for: Renal deposits of complement factors as predictors of end-stage renal disease and death in patients with lupus nephritis
Source: PubMed Central journal article supplement — Rheumatology (Oxford). 2020 May 15;59(12):3751–8. doi: 10.1093/rheumatology/keaa174 (PMC7733722; doi:10.1093/rheumatology/keaa174), 2020-05-15
Supplement: keaa174_supplementary_tables.pdf [file keaa174_supplementary_tables.pdf]

**Supplementary Table S1A. Characteristics of the study population by the presence of deposits of complement factors**

|                                                          | Glomerular deposits of C1q |                   |                   | Glomerular deposits of C3 |                   |              |
|----------------------------------------------------------|----------------------------|-------------------|-------------------|---------------------------|-------------------|--------------|
|                                                          | Absent                     | Present           | <i>P</i>          | Absent                    | Present           | <i>P</i>     |
| Number of patients, <i>n</i>                             | 37                         | 146               |                   | 18                        | 165               |              |
| Age, median (iqr), years                                 | 35 (28-44)                 | 36 (26-45)        | 0.87              | 36 (31-54)                | 35 (26-45)        | 0.16         |
| Female sex, %                                            | 89.2                       | 82.2              | 0.30              | 77.8                      | 84.2              | 0.48         |
| Race/ethnicity, %                                        |                            |                   | 0.19              |                           |                   | 0.28         |
| White                                                    | 46.0                       | 33.6              |                   | 38.9                      | 35.8              |              |
| Black                                                    | 37.8                       | 30.1              |                   | 50.0                      | 29.7              |              |
| Hispanic                                                 | 8.1                        | 20.6              |                   | 5.6                       | 19.4              |              |
| Asian                                                    | 8.1                        | 12.3              |                   | 5.6                       | 12.1              |              |
| Other or unknown                                         | 0.0                        | 3.4               |                   | 0.0                       | 3.0               |              |
| Past medical history, %                                  |                            |                   |                   |                           |                   |              |
| Hypertension                                             | 64.9                       | 56.9              | 0.38              | 72.2                      | 57.0              | 0.21         |
| Diabetes mellitus                                        | 2.7                        | 5.5               | 0.49              | 0.0                       | 5.5               | 0.31         |
| Current hypertension, %                                  | 19.4                       | 32.0              | 0.17              | <b>53.3</b>               | <b>27.1</b>       | <b>0.03</b>  |
| Duration of SLE, median (iqr), years                     | 5.8 (1.8-11.2)             | 2.9 (0.4-10.5)    | 0.21              | 3.8 (1.9-7.2)             | 3.6 (0.5-10.7)    | 0.82         |
| SLICC/ACR damage index, median (iqr) <sup>a</sup>        | 3 (1-5)                    | 2 (0-4)           | 0.07              | 4 (1-5)                   | 2 (1-4)           | 0.10         |
| Medication, %                                            |                            |                   |                   |                           |                   |              |
| ACE inhibitors                                           | 22.2                       | 30.0              | 0.36              | 11.1                      | 30.4              | 0.09         |
| NSAIDs                                                   | 22.2                       | 23.9              | 0.84              | 33.3                      | 22.3              | 0.30         |
| HCQ                                                      | 58.3                       | 49.2              | 0.33              | 72.2                      | 48.7              | 0.06         |
| High-dose corticosteroids <sup>b</sup>                   | 30.6                       | 30.8              | 0.98              | 33.3                      | 30.4              | 0.80         |
| Immunosuppressives <sup>c</sup>                          | 11.1                       | 23.9              | 0.10              | 5.6                       | 23.0              | 0.09         |
| Haemoglobin, median (iqr), g/dl                          | 11.5 (10.1-12.3)           | 10.6 (9.2-12.0)   | 0.09              | 12.0 (8.7-12.3)           | 10.8 (9.3-12.0)   | 0.32         |
| Serum albumin, median (iqr), g/dl                        | 3.4 (2.9-4.0)              | 3.1 (2.7-3.5)     | 0.06              | 3.4 (2.9-4.1)             | 3.2 (2.7-3.5)     | 0.13         |
| Serum creatinine, median (iqr), mg/dl                    | 0.9 (0.7-1.5)              | 0.9 (0.7-1.2)     | 0.69              | 1.0 (0.7-2.0)             | 0.9 (0.7-1.3)     | 0.23         |
| eGFR, median (iqr), ml/min/1.73 m <sup>2</sup>           | 91 (44-119)                | 93 (58-119)       | 0.77              | 95 (28-114)               | 93 (58-120)       | 0.35         |
| Proteinuria, % <sup>d</sup>                              | 69.7                       | 74.2              | 0.60              | 73.3                      | 73.2              | 0.99         |
| Serum C3, median (iqr), mg/dl                            | <b>83 (57-116)</b>         | <b>57 (40-73)</b> | <b>&lt; 0.001</b> | <b>97 (64-126)</b>        | <b>57 (42-80)</b> | <b>0.004</b> |
| Serum C4, median (iqr), mg/dl                            | <b>13 (8-23)</b>           | <b>8 (6-13)</b>   | <b>0.003</b>      | <b>15 (9-23)</b>          | <b>9 (6-13)</b>   | <b>0.04</b>  |
| Anti-dsDNA antibodies, %                                 | 75.8                       | 82.5              | 0.38              | 71.4                      | 82.1              | 0.33         |
| aPL antibodies, % <sup>e</sup>                           | 55.6                       | 31.1              | 0.05              | 55.6                      | 33.7              | 0.20         |
| Glomerulosclerosis, median (iqr), %                      | 9 (1-31)                   | 5 (0-18)          | 0.08              | 10 (0-41)                 | 5 (0-20)          | 0.13         |
| IF/TA, median (iqr), %                                   | 10 (0-20)                  | 10 (0-20)         | 0.91              | 10 (0-35)                 | 10 (0-20)         | 0.47         |
| Any tubulointerstitial inflammation, %                   | 16.2                       | 13.8              | 0.71              | 16.7                      | 14.0              | 0.76         |
| Moderate to severe vascular damage, %                    | 40.5                       | 34.3              | 0.48              | 50.0                      | 33.9              | 0.18         |
| Pathological activity index, median (iqr) <sup>f</sup>   | <b>3 (1-8)</b>             | <b>7 (2-11)</b>   | <b>0.04</b>       | 3 (1-8)                   | 6 (2-11)          | 0.18         |
| Pathological chronicity index, median (iqr) <sup>g</sup> | 2 (1-5)                    | 2 (0-3)           | 0.19              | <b>4 (1-5)</b>            | <b>2 (0-3)</b>    | <b>0.05</b>  |

**Supplementary Table S1B. Characteristics of the study population by the presence of deposits of complement factors**

|                                                          | Tubular deposits of C1q |                       |                   | Tubular deposits of C3 |                      |              |
|----------------------------------------------------------|-------------------------|-----------------------|-------------------|------------------------|----------------------|--------------|
|                                                          | Absent                  | Present               | <i>P</i>          | Absent                 | Present              | <i>P</i>     |
| Number of patients, <i>n</i>                             | 147                     | 36                    |                   | 100                    | 83                   |              |
| Age, median (iqr), years                                 | 36 (26-45)              | 32 (29-43)            | 0.75              | 36 (26-44)             | 36 (27-47)           | 0.54         |
| Female sex, %                                            | 83.7                    | 83.3                  | 0.96              | 79.0                   | 89.2                 | 0.07         |
| Race/ethnicity, %                                        |                         |                       | 0.13              |                        |                      | 0.47         |
| White                                                    | 39.5                    | 22.2                  |                   | 40.0                   | 31.3                 |              |
| Black                                                    | 30.6                    | 36.1                  |                   | 29.0                   | 34.9                 |              |
| Hispanic                                                 | 18.4                    | 16.7                  |                   | 20.0                   | 15.7                 |              |
| Asian                                                    | 8.8                     | 22.2                  |                   | 9.0                    | 14.5                 |              |
| Other or unknown                                         | 2.7                     | 2.8                   |                   | 2.0                    | 3.6                  |              |
| Past medical history, %                                  |                         |                       |                   |                        |                      |              |
| Hypertension                                             | 59.2                    | 55.6                  | 0.69              | 62.0                   | 54.2                 | 0.29         |
| Diabetes mellitus                                        | 4.1                     | 8.3                   | 0.29              | 6.0                    | 3.6                  | 0.46         |
| Current hypertension, %                                  | <b>22.7</b>             | <b>58.1</b>           | <b>&lt; 0.001</b> | <b>23.0</b>            | <b>37.5</b>          | <b>0.046</b> |
| Duration of SLE, median (iqr), years                     | 4.0 (0.6-11.9)          | 3.4 (0.3-7.0)         | 0.32              | 3.3 (0.5-11.9)         | 4.2 (0.7-9.5)        | 0.76         |
| SLICC/ACR damage index, median (iqr) <sup>a</sup>        | 2 (1-4)                 | 2 (0-5)               | 0.90              | 2 (1-4)                | 2 (1-4)              | 0.67         |
| Medication, %                                            |                         |                       |                   |                        |                      |              |
| ACE inhibitors                                           | 26.5                    | 36.7                  | 0.26              | 27.5                   | 29.3                 | 0.79         |
| NSAIDs                                                   | 25.0                    | 16.7                  | 0.33              | 23.1                   | 24.0                 | 0.89         |
| HCQ                                                      | 52.9                    | 43.3                  | 0.34              | 53.9                   | 48.0                 | 0.45         |
| High-dose corticosteroids <sup>b</sup>                   | 30.9                    | 30.0                  | 0.92              | 29.7                   | 32.0                 | 0.75         |
| Immunosuppressives <sup>c</sup>                          | 19.9                    | 26.7                  | 0.41              | 19.8                   | 22.7                 | 0.65         |
| Haemoglobin, median (iqr), g/dl                          | <b>11.0 (9.7-12.3)</b>  | <b>9.8 (8.9-10.6)</b> | <b>&lt; 0.001</b> | 11.0 (9.7-12.2)        | 10.5 (9.2-12.0)      | 0.20         |
| Serum albumin, median (iqr), g/dl                        | <b>3.3 (2.9-3.6)</b>    | <b>2.8 (2.5-3.2)</b>  | <b>0.001</b>      | <b>3.4 (2.9-3.7)</b>   | <b>3.0 (2.5-3.5)</b> | <b>0.008</b> |
| Serum creatinine, median (iqr), mg/dl                    | 0.9 (0.7-1.2)           | 1.0 (0.7-1.6)         | 0.36              | 0.9 (0.7-1.2)          | 0.9 (0.7-1.5)        | 0.51         |
| eGFR, median (iqr), ml/min/1.73 m <sup>2</sup>           | 93 (60-120)             | 81 (44-118)           | 0.34              | 93 (60-122)            | 90 (46-118)          | 0.38         |
| Proteinuria, % <sup>d</sup>                              | 73.0                    | 74.2                  | 0.89              | 71.8                   | 75.0                 | 0.65         |
| Serum C3, median (iqr), mg/dl                            | <b>64 (47-91)</b>       | <b>47 (36-57)</b>     | <b>&lt; 0.001</b> | <b>69 (44-103)</b>     | <b>57 (43-68)</b>    | <b>0.005</b> |
| Serum C4, median (iqr), mg/dl                            | <b>10 (7-16)</b>        | <b>7 (6-9)</b>        | <b>0.006</b>      | 10 (6-18)              | 8 (6-12)             | 0.12         |
| Anti-dsDNA antibodies, %                                 | 78.5                    | 93.1                  | 0.07              | <b>75.3</b>            | <b>88.6</b>          | <b>0.03</b>  |
| aPL antibodies, % <sup>e</sup>                           | 38.4                    | 26.3                  | 0.33              | 39.2                   | 31.7                 | 0.46         |
| Glomerulosclerosis, median (iqr), %                      | 5 (0-22)                | 6 (0-20)              | 0.97              | 5 (0-23)               | 5 (0-18)             | 0.72         |
| IF/TA, median (iqr), %                                   | 10 (0-20)               | 10 (3-23)             | 0.27              | 10 (0-20)              | 10 (0-20)            | 0.73         |
| Any tubulointerstitial inflammation, %                   | 12.3                    | 22.2                  | 0.13              | 12.1                   | 16.9                 | 0.36         |
| Moderate to severe vascular damage, %                    | 33.3                    | 44.4                  | 0.21              | <b>29.0</b>            | <b>43.4</b>          | <b>0.04</b>  |
| Pathological activity index, median (iqr) <sup>f</sup>   | <b>4 (1-9)</b>          | <b>10 (6-13)</b>      | <b>0.003</b>      | <b>5 (1-9)</b>         | <b>7 (2-11)</b>      | <b>0.03</b>  |
| Pathological chronicity index, median (iqr) <sup>g</sup> | 2 (0-3)                 | 2 (1-4)               | 0.39              | 2 (0-3)                | 2 (1-4)              | 0.11         |

**Supplementary Table S1C. Characteristics of the study population by the presence of deposits of complement factors**

|                                                          | Vascular deposits of C1q |                       |              | Vascular deposits of C3 |                 |             |
|----------------------------------------------------------|--------------------------|-----------------------|--------------|-------------------------|-----------------|-------------|
|                                                          | Absent                   | Present               | <i>P</i>     | Absent                  | Present         | <i>P</i>    |
| Number of patients, <i>n</i>                             | 145                      | 38                    |              | 52                      | 131             |             |
| Age, median (iqr), years                                 | 36 (26-45)               | 35 (26-45)            | 0.92         | 35 (26-43)              | 36 (26-46)      | 0.70        |
| Female sex, %                                            | 83.5                     | 84.2                  | 0.91         | 78.9                    | 85.5            | 0.27        |
| Race/ethnicity, %                                        |                          |                       | 0.42         |                         |                 | 0.36        |
| White                                                    | 37.9                     | 29.0                  |              | 30.8                    | 38.2            |             |
| Black                                                    | 29.0                     | 42.1                  |              | 36.5                    | 29.8            |             |
| Hispanic                                                 | 18.6                     | 15.8                  |              | 23.1                    | 16.0            |             |
| Asian                                                    | 11.0                     | 13.2                  |              | 9.6                     | 12.2            |             |
| Other or unknown                                         | 3.5                      | 0.0                   |              | 0.0                     | 3.8             |             |
| Past medical history, %                                  |                          |                       |              |                         |                 |             |
| Hypertension                                             | 58.6                     | 57.9                  | 0.94         | 57.7                    | 58.8            | 0.89        |
| Diabetes mellitus                                        | 5.5                      | 2.6                   | 0.46         | 5.8                     | 4.6             | 0.74        |
| Current hypertension, %                                  | <b>24.6</b>              | <b>46.0</b>           | <b>0.01</b>  | 23.8                    | 31.6            | 0.34        |
| Duration of SLE, median (iqr), years                     | 5.0 (0.6-11.9)           | 1.9 (0.4-5.6)         | 0.12         | 3.6 (0.5-9.3)           | 3.8 (0.6-11.5)  | 0.31        |
| SLICC/ACR damage index, median (iqr) <sup>a</sup>        | 2 (1-4)                  | 2 (1-5)               | 0.53         | 2 (1-4)                 | 2 (1-5)         | 0.89        |
| Medication, %                                            |                          |                       |              |                         |                 |             |
| ACE inhibitors                                           | 27.6                     | 31.3                  | 0.68         | 20.8                    | 31.4            | 0.17        |
| NSAIDs                                                   | 22.4                     | 28.1                  | 0.49         | 33.3                    | 19.5            | 0.06        |
| HCQ                                                      | 54.5                     | 37.5                  | 0.08         | 62.5                    | 46.6            | 0.06        |
| High-dose corticosteroids <sup>b</sup>                   | 30.6                     | 31.3                  | 0.94         | 20.8                    | 34.8            | 0.08        |
| Immunosuppressives <sup>c</sup>                          | 20.2                     | 25.0                  | 0.55         | 14.6                    | 23.7            | 0.19        |
| Haemoglobin, median (iqr), g/dl                          | <b>11.0 (9.7-12.2)</b>   | <b>9.7 (8.8-11.1)</b> | <b>0.004</b> | 11.0 (9.6-12.4)         | 10.8 (9.3-12.0) | 0.40        |
| Serum albumin, median (iqr), g/dl                        | <b>3.3 (2.8-3.6)</b>     | <b>2.9 (2.4-3.3)</b>  | <b>0.01</b>  | 3.3 (2.8-3.9)           | 3.2 (2.7-3.5)   | 0.19        |
| Serum creatinine, median (iqr), mg/dl                    | 0.9 (0.7-1.3)            | 0.9 (0.6-1.2)         | 0.36         | 0.90 (0.70-1.50)        | 0.9 (0.7-1.2)   | 0.86        |
| eGFR, median (iqr), ml/min/1.73 m <sup>2</sup>           | 92 (57-118)              | 93 (51-123)           | 0.36         | 99 (46-124)             | 90 (58-118)     | 0.66        |
| Proteinuria, % <sup>d</sup>                              | 74.4                     | 69.4                  | 0.56         | <b>61.0</b>             | <b>77.6</b>     | <b>0.04</b> |
| Serum C3, median (iqr), mg/dl                            | <b>64 (46-90)</b>        | <b>48 (37-63)</b>     | <b>0.003</b> | 65 (44-106)             | 58 (43-80)      | 0.20        |
| Serum C4, median (iqr), mg/dl                            | <b>10 (7-17)</b>         | <b>7 (6-9)</b>        | <b>0.001</b> | 11 (7-16)               | 8 (6-13)        | 0.07        |
| Anti-dsDNA antibodies, %                                 | <b>77.6</b>              | <b>94.1</b>           | <b>0.03</b>  | 71.7                    | 85.0            | 0.05        |
| aPL antibodies, % <sup>e</sup>                           | 36.5                     | 33.3                  | 0.80         | 44.4                    | 32.3            | 0.27        |
| Glomerulosclerosis, median (iqr), %                      | 5 (0-22)                 | 8 (0-22)              | 0.72         | 5 (0-23)                | 5 (0-21)        | 0.76        |
| IF/TA, median (iqr), %                                   | 10 (0-20)                | 10 (5-20)             | 0.09         | 10 (0-20)               | 10 (0-20)       | 0.67        |
| Any tubulointerstitial inflammation, %                   | 13.2                     | 18.4                  | 0.41         | 17.7                    | 13.0            | 0.42        |
| Moderate to severe vascular damage, %                    | 32.4                     | 47.4                  | 0.09         | 25.0                    | 39.7            | 0.06        |
| Pathological activity index, median (iqr) <sup>f</sup>   | 5 (1-10)                 | 7 (2-13)              | 0.10         | 4 (1-11)                | 7 (2-11)        | 0.12        |
| Pathological chronicity index, median (iqr) <sup>g</sup> | 2 (0-3)                  | 3 (1-4)               | 0.08         | 2 (1-3)                 | 2 (1-3)         | 0.78        |

<sup>a</sup> Excluding the parameters reflecting renal damage, maximum score of 37. <sup>b</sup> Prednisone  $\geq 20$  mg/d or equivalent. <sup>c</sup> Including azathioprine, cyclophosphamide, mycophenolate mofetil, methotrexate, rituximab. <sup>d</sup> Protein-creatinine ratio  $\geq 1$  g/g. <sup>e</sup> aCL antibodies, anti- $\beta$ 2-glycoprotein antibodies, or lupus anticoagulant detected at least twice. <sup>f</sup> Maximum score of 24. <sup>g</sup> Maximum score of 12. ACE: angiotensin-converting enzyme; IF/TA: interstitial fibrosis and tubular atrophy; iqr: interquartile range.

**Supplementary Table S2. Characteristics of the study population by the intensity of glomerular deposits of complement factors**

|                                                          | Glomerular deposits of C1q           |                   | Glomerular deposits of C3            |                   |
|----------------------------------------------------------|--------------------------------------|-------------------|--------------------------------------|-------------------|
|                                                          | Correlation coefficient <sup>h</sup> | P                 | Correlation coefficient <sup>h</sup> | P                 |
| Age, median (iqr), years                                 | -0.13                                | 0.07              | <b>-0.16</b>                         | <b>0.04</b>       |
| Female sex, %                                            | -0.08                                | 0.30              | 0.07                                 | 0.35              |
| Race/ethnicity, %                                        |                                      |                   |                                      |                   |
| White                                                    | <b>-0.16</b>                         | <b>0.03</b>       | -0.02                                | 0.78              |
| Black                                                    | -0.09                                | 0.21              | -0.11                                | 0.16              |
| Hispanic                                                 | <b>0.16</b>                          | <b>0.03</b>       | 0.06                                 | 0.43              |
| Asian                                                    | <b>0.16</b>                          | <b>0.04</b>       | 0.08                                 | 0.31              |
| Other or unknown                                         | 0.05                                 | 0.51              | 0.09                                 | 0.30              |
| Past medical history, %                                  |                                      |                   |                                      |                   |
| Hypertension                                             | -0.12                                | 0.10              | -0.13                                | 0.07              |
| Diabetes mellitus                                        | 0.06                                 | 0.46              | -0.05                                | 0.47              |
| Current hypertension, %                                  | <b>0.16</b>                          | <b>0.04</b>       | -0.04                                | 0.58              |
| Duration of SLE, median (iqr), years                     | -0.13                                | 0.09              | -0.05                                | 0.53              |
| SLICC/ACR damage index, median (iqr) <sup>a</sup>        | <b>-0.18</b>                         | <b>0.02</b>       | <b>-0.20</b>                         | <b>0.01</b>       |
| Medication, %                                            |                                      |                   |                                      |                   |
| ACE inhibitors                                           | 0.04                                 | 0.60              | 0.12                                 | 0.13              |
| NSAIDs                                                   | 0.02                                 | 0.83              | 0.05                                 | 0.56              |
| HCQ                                                      | -0.06                                | 0.47              | -0.02                                | 0.76              |
| High-dose corticosteroids <sup>b</sup>                   | 0.07                                 | 0.40              | 0.07                                 | 0.40              |
| Immunosuppressives <sup>c</sup>                          | <b>0.20</b>                          | <b>0.009</b>      | <b>0.20</b>                          | <b>0.009</b>      |
| Haemoglobin, median (iqr), g/dl                          | <b>-0.18</b>                         | <b>0.02</b>       | <b>-0.21</b>                         | <b>0.008</b>      |
| Serum albumin, median (iqr), g/dl                        | <b>-0.21</b>                         | <b>0.008</b>      | <b>-0.16</b>                         | <b>0.04</b>       |
| Serum creatinine, median (iqr), mg/dl                    | -0.08                                | 0.29              | 0.00                                 | 1.00              |
| eGFR, median (iqr), ml/min/1.73 m <sup>2</sup>           | 0.09                                 | 0.25              | -0.01                                | 0.92              |
| Proteinuria, % <sup>d</sup>                              | 0.03                                 | 0.76              | 0.04                                 | 0.62              |
| Serum C3, median (iqr), mg/dl                            | <b>-0.38</b>                         | <b>&lt; 0.001</b> | <b>-0.34</b>                         | <b>&lt; 0.001</b> |
| Serum C4, median (iqr), mg/dl                            | <b>-0.33</b>                         | <b>&lt; 0.001</b> | <b>-0.24</b>                         | <b>0.004</b>      |
| Anti-dsDNA antibodies, %                                 | 0.10                                 | 0.20              | <b>0.28</b>                          | <b>&lt; 0.001</b> |
| aPL antibodies, % <sup>e</sup>                           | -0.14                                | 0.17              | <b>-0.27</b>                         | <b>0.01</b>       |
| Glomerulosclerosis, median (iqr), %                      | -0.10                                | 0.20              | <b>-0.16</b>                         | <b>0.03</b>       |
| IF/TA, median (iqr), %                                   | -0.05                                | 0.55              | -0.13                                | 0.08              |
| Any tubulointerstitial inflammation, %                   | -0.05                                | 0.49              | -0.01                                | 0.92              |
| Moderate to severe vascular damage, %                    | 0.00                                 | 0.96              | -0.14                                | 0.06              |
| Pathological activity index, median (iqr) <sup>f</sup>   | <b>0.26</b>                          | <b>0.003</b>      | <b>0.32</b>                          | <b>&lt; 0.001</b> |
| Pathological chronicity index, median (iqr) <sup>g</sup> | -0.08                                | 0.40              | -0.18                                | 0.05              |

<sup>a</sup> Excluding the parameters reflecting renal damage, maximum score of 37. <sup>b</sup> Prednisone  $\geq 20$  mg/d or equivalent. <sup>c</sup> Including azathioprine, cyclophosphamide, mycophenolate mofetil, methotrexate, rituximab. <sup>d</sup> Protein-creatinine ratio  $\geq 1$  g/g. <sup>e</sup> aCL antibodies, anti- $\beta$ 2-glycoprotein antibodies, or lupus anticoagulant detected at least twice. <sup>f</sup> Maximum score of 24. <sup>g</sup> Maximum score of 12. <sup>h</sup> Spearman's correlation coefficient. ACE: angiotensin-converting enzyme; IF/TA: interstitial fibrosis and tubular atrophy; iqr: interquartile range.

**Supplementary Table S3A. Characteristics of the study population by the presence of deposits of complement factors**

|                                                          | Glomerular deposits    |                    |             | Tubular deposits       |                        |              |
|----------------------------------------------------------|------------------------|--------------------|-------------|------------------------|------------------------|--------------|
|                                                          | C1q with or without C3 | C3 only            | <i>P</i>    | C1q with or without C3 | C3 only                | <i>P</i>     |
| Number of patients, <i>n</i>                             | 146                    | 23                 |             | 36                     | 51                     |              |
| Age, median (iqr), years                                 | 36 (26-45)             | 33 (25-44)         | 0.49        | 32 (29-43)             | 37 (26-47)             | 0.53         |
| Female sex, %                                            | 82.2                   | 95.7               | 0.10        | 83.3                   | 92.2                   | 0.20         |
| Race/ethnicity, %                                        |                        |                    | 0.47        |                        |                        | 0.43         |
| White                                                    | 33.6                   | 43.5               |             | 22.2                   | 37.3                   |              |
| Black                                                    | 30.1                   | 39.1               |             | 36.1                   | 33.3                   |              |
| Hispanic                                                 | 20.6                   | 8.7                |             | 16.7                   | 15.7                   |              |
| Asian                                                    | 12.3                   | 8.7                |             | 22.2                   | 9.8                    |              |
| Other or unknown                                         | 3.4                    | 0.0                |             | 2.8                    | 3.9                    |              |
| Past medical history, %                                  |                        |                    |             |                        |                        |              |
| Hypertension                                             | 56.9                   | 56.5               | 0.98        | 55.6                   | 56.9                   | 0.90         |
| Diabetes mellitus                                        | 5.5                    | 4.4                | 0.82        | 8.3                    | 2.0                    | 0.16         |
| Current hypertension, %                                  | <b>32.0</b>            | <b>5.0</b>         | <b>0.01</b> | <b>58.1</b>            | <b>24.4</b>            | <b>0.003</b> |
| Duration of SLE, median (iqr), years                     | 2.9 (0.4-10.5)         | 6.1 (1.7-10.7)     | 0.28        | 3.4 (0.3-7.0)          | 5.9 (1.3-11.5)         | 0.11         |
| SLICC/ACR damage index, median (iqr) <sup>a</sup>        | 2 (0-4)                | 2 (1-6)            | 0.25        | 2 (0-5)                | 2 (1-4)                | 0.80         |
| Medication, %                                            |                        |                    |             |                        |                        |              |
| ACE inhibitors                                           | 30.0                   | 27.3               | 0.80        | 36.7                   | 22.9                   | 0.19         |
| NSAIDs                                                   | 23.9                   | 22.7               | 0.91        | 16.7                   | 27.1                   | 0.29         |
| HCQ                                                      | 49.2                   | 50.0               | 0.95        | 43.3                   | 50.0                   | 0.57         |
| High-dose corticosteroids <sup>b</sup>                   | 30.8                   | 27.3               | 0.74        | 30.0                   | 31.3                   | 0.91         |
| Immunosuppressives <sup>c</sup>                          | 23.9                   | 13.6               | 0.29        | 26.7                   | 20.8                   | 0.55         |
| Haemoglobin, median (iqr), g/dl                          | 10.6 (9.2-12.0)        | 11.2 (10.7-12.4)   | 0.14        | <b>9.8 (8.9-10.6)</b>  | <b>10.9 (9.4-12.4)</b> | <b>0.005</b> |
| Serum albumin, median (iqr), g/dl                        | 3.1 (2.7-3.5)          | 3.2 (2.8-3.7)      | 0.50        | 2.8 (2.5-3.2)          | 3.2 (2.4-3.5)          | 0.06         |
| Serum creatinine, median (iqr), mg/dl                    | 0.9 (0.7-1.2)          | 0.9 (0.7-1.4)      | 0.89        | 1.0 (0.7-1.6)          | 0.8 (0.7-1.2)          | 0.55         |
| eGFR, median (iqr), ml/min/1.73 m <sup>2</sup>           | 93 (58-119)            | 88 (50-127)        | 0.83        | 81 (44-118)            | 93 (58-119)            | 0.64         |
| Proteinuria, % <sup>d</sup>                              | 74.2                   | 71.4               | 0.79        | 74.2                   | 75.6                   | 0.89         |
| Serum C3, median (iqr), mg/dl                            | <b>57 (40-73)</b>      | <b>69 (57-105)</b> | <b>0.02</b> | <b>47 (36-57)</b>      | <b>61 (46-73)</b>      | <b>0.01</b>  |
| Serum C4, median (iqr), mg/dl                            | <b>8 (6-13)</b>        | <b>13 (8-20)</b>   | <b>0.03</b> | <b>7 (6-9)</b>         | <b>9 (7-13)</b>        | <b>0.04</b>  |
| Anti-dsDNA antibodies, %                                 | 82.5                   | 76.2               | 0.49        | 93.1                   | 86.4                   | 0.37         |
| aPL antibodies, % <sup>e</sup>                           | 31.1                   | 54.6               | 0.13        | 26.3                   | 40.0                   | 0.34         |
| Glomerulosclerosis, median (iqr), %                      | 5 (0-18)               | 5 (1-24)           | 0.40        | 6 (0-20)               | 5 (0-21)               | 0.89         |
| IF/TA, median (iqr), %                                   | 10 (0-20)              | 10 (0-20)          | 0.74        | 10 (3-23)              | 10 (0-15)              | 0.48         |
| Any tubulointerstitial inflammation, %                   | 13.8                   | 17.4               | 0.65        | 22.2                   | 13.7                   | 0.30         |
| Moderate to severe vascular damage, %                    | 34.3                   | 39.1               | 0.65        | 44.4                   | 43.1                   | 0.90         |
| Pathological activity index, median (iqr) <sup>f</sup>   | 7 (2-11)               | 3 (1-7)            | 0.12        | <b>10 (6-13)</b>       | <b>5 (2-11)</b>        | <b>0.02</b>  |
| Pathological chronicity index, median (iqr) <sup>g</sup> | 2 (0-3)                | 2 (0-3)            | 0.98        | 2 (1-4)                | 2 (1-3)                | 0.99         |

**Supplementary Table S3B. Characteristics of the study population by the presence of deposits of complement factors**

|                                                          | Vascular deposits     |                        |              |
|----------------------------------------------------------|-----------------------|------------------------|--------------|
|                                                          | C1q ± C3              | C3 only                | P            |
| Number of patients, <i>n</i>                             | 38                    | 96                     |              |
| Age, median (iqr), years                                 | 35 (26-45)            | 37 (26-45)             | 0.88         |
| Female sex, %                                            | 84.2                  | 86.5                   | 0.73         |
| Race/ethnicity, %                                        |                       |                        | 0.21         |
| White                                                    | 29.0                  | 41.7                   |              |
| Black                                                    | 42.1                  | 25.0                   |              |
| Hispanic                                                 | 15.8                  | 15.6                   |              |
| Asian                                                    | 13.2                  | 12.5                   |              |
| Other or unknown                                         | 0.0                   | 5.2                    |              |
| Past medical history, %                                  |                       |                        |              |
| Hypertension                                             | 57.9                  | 59.4                   | 0.88         |
| Diabetes mellitus                                        | 2.6                   | 6.3                    | 0.40         |
| Current hypertension, %                                  | <b>46.0</b>           | <b>25.3</b>            | <b>0.03</b>  |
| Duration of SLE, median (iqr), years                     | 1.9 (0.4-5.6)         | 5.8 (0.8-12.0)         | 0.05         |
| SLICC/ACR damage index, median (iqr) <sup>a</sup>        | 2 (1-5)               | 2 (0-5)                | 0.63         |
| Medication, %                                            |                       |                        |              |
| ACE inhibitors                                           | 31.3                  | 30.3                   | 0.92         |
| NSAIDs                                                   | 28.1                  | 16.9                   | 0.17         |
| HCQ                                                      | 37.5                  | 49.4                   | 0.25         |
| High-dose corticosteroids <sup>b</sup>                   | 31.3                  | 34.8                   | 0.71         |
| Immunosuppressives <sup>c</sup>                          | 25.0                  | 23.6                   | 0.87         |
| Haemoglobin, median (iqr), g/dl                          | <b>9.7 (8.8-11.1)</b> | <b>10.9 (9.7-12.1)</b> | <b>0.006</b> |
| Serum albumin, median (iqr), g/dl                        | <b>2.9 (2.4-3.3)</b>  | <b>3.3 (2.7-3.5)</b>   | <b>0.03</b>  |
| Serum creatinine, median (iqr), mg/dl                    | 0.9 (0.6-1.2)         | 0.9 (0.7-1.2)          | 0.44         |
| eGFR, median (iqr), ml/min/1.73 m <sup>2</sup>           | 93 (51-123)           | 90 (59-118)            | 0.32         |
| Proteinuria, % <sup>d</sup>                              | 69.4                  | 80.7                   | 0.18         |
| Serum C3, median (iqr), mg/dl                            | <b>48 (37-63)</b>     | <b>61 (44-83)</b>      | <b>0.007</b> |
| Serum C4, median (iqr), mg/dl                            | <b>7 (6-9)</b>        | <b>9 (7-15)</b>        | <b>0.008</b> |
| Anti-dsDNA antibodies, %                                 | 94.1                  | 81.7                   | 0.09         |
| aPL antibodies, % <sup>e</sup>                           | 33.3                  | 32.0                   | 0.92         |
| Glomerulosclerosis, median (iqr), %                      | 8 (0-22)              | 5 (0-20)               | 0.70         |
| IF/TA, median (iqr), %                                   | 10 (5-20)             | 10 (0-18)              | 0.07         |
| Any tubulointerstitial inflammation, %                   | 18.4                  | 10.4                   | 0.21         |
| Moderate to severe vascular damage, %                    | 47.4                  | 36.5                   | 0.24         |
| Pathological activity index, median (iqr) <sup>f</sup>   | 7 (2-13)              | 6 (2-10)               | 0.21         |
| Pathological chronicity index, median (iqr) <sup>g</sup> | 3 (1-4)               | 2 (0-3)                | 0.08         |



Jacob J. E. Koopman et al. Renal deposits of complement factors as predictors of end-stage renal disease and death in patients with lupus nephritis. *Rheumatology (Oxford)*

<sup>a</sup> Excluding the parameters reflecting renal damage, maximum score of 37. <sup>b</sup> Prednisone  $\geq 20$  mg/d or equivalent. <sup>c</sup> Including azathioprine, cyclophosphamide, mycophenolate mofetil, methotrexate, rituximab. <sup>d</sup> Protein-creatinine ratio  $\geq 1$  g/g. <sup>e</sup> aCL antibodies, anti- $\beta$ 2-glycoprotein antibodies, or lupus anticoagulant detected at least twice. <sup>f</sup> Maximum score of 24. <sup>g</sup> Maximum score of 12. ACE: angiotensin-converting enzyme; IF/TA: interstitial fibrosis and tubular atrophy; iqr: interquartile range.

**Supplementary Table S4A. Change in estimated glomerular filtration rate over a year and renal deposits of complement factors**

|                                                          | All                        | Class II              | Class III               | Class IV                   | Class V            |
|----------------------------------------------------------|----------------------------|-----------------------|-------------------------|----------------------------|--------------------|
| Number of patients, <i>n</i>                             | 135                        | 18                    | 37                      | 47                         | 33                 |
| Change in eGFR, median (iqr), ml/min/1.73 m <sup>2</sup> | 1.4 (-11.8; 20.0)          | -2.6 (-8.3; 12.5)     | -0.6 (-10.9; 15.2)      | 14.6 (-9.2; 32.3)          | -5.4 (-12.6; 5.8)  |
| <b>Estimates of change in eGFR<sup>a</sup></b>           |                            |                       |                         |                            |                    |
| Glomerular deposits                                      |                            |                       |                         |                            |                    |
| Presence of C1q                                          | <b>12.3 (2.0; 22.5)</b>    | 10.3 (-12.9; 33.6)    | <b>20.4 (2.3; 38.4)</b> | 9.1 (-14.2; 32.5)          | 4.0 (-15.3; 23.3)  |
| Presence of C3                                           | <b>16.6 (2.8; 30.4)</b>    | 12.8 (-12.2; 37.9)    | <b>29.7 (8.8; 50.7)</b> | 0.9 (-40.6; 42.4)          | 4.1 (-29.1; 37.2)  |
| Intensity of C1q                                         | <b>3.6 (0.2; 7.0)</b>      | 4.0 (-8.3; 16.3)      | 4.2 (-2.0; 10.4)        | 3.7 (-3.3; 10.7)           | -0.4 (-7.3; 6.4)   |
| Intensity of C3                                          | <b>7.2 (3.4; 11.0)</b>     | 5.8 (-4.0; 15.6)      | <b>9.7 (2.7; 16.7)</b>  | 4.3 (-4.1; 12.7)           | 6.0 (-2.1; 14.0)   |
| Presence of C1q with or without C3                       | 5.4 (-7.0; 17.8)           | -0.8 (-34.6; 32.9)    | 4.1 (-20.7; 28.9)       | 8.4 (-16.8; 33.7)          | 2.9 (-18.0; 23.7)  |
| Presence of C3 only                                      | -5.4 (-17.8; 7.0)          | 0.8 (-32.9; 34.6)     | -4.1 (-28.9; 20.7)      | -8.4 (-33.7; 16.8)         | -2.9 (-23.7; 18.0) |
| Tubular deposits                                         |                            |                       |                         |                            |                    |
| Presence of C1q                                          | <b>13.6 (2.4; 24.8)</b>    | 1.2 (-49.6; 52.0)     | 5.3 (-14.0; 24.6)       | 18.3 (-0.1; 36.7)          | 3.3 (-29.8; 36.5)  |
| Presence of C3                                           | 3.6 (-5.0; 12.2)           | -10.3 (-46.9; 26.3)   | 3.7 (-12.7; 20.0)       | -3.3 (-20.5; 13.9)         | 9.0 (-6.4; 24.5)   |
| Presence of C1q with or without C3                       | <b>15.1 (1.4; 28.8)</b>    | 10.3 (-318.3; 339.9)  | 6.1 (-16.9; 29.1)       | <b>25.4 (2.8; 48.0)</b>    | -1.4 (-45.5; 42.7) |
| Presence of C3 only                                      | <b>-15.1 (-28.8; -1.4)</b> | -10.3 (-338.9; 318.3) | -6.1 (-29.1; 16.9)      | <b>-25.4 (-48.0; -2.8)</b> | 1.4 (-42.7; 45.5)  |
| Vascular deposits                                        |                            |                       |                         |                            |                    |
| Presence of C1q                                          | 4.6 (-5.8; 15.1)           | -11.0 (-41.7; 19.6)   | 2.0 (-17.4; 21.3)       | 10.3 (-8.1; 28.8)          | -3.1 (-25.1; 19.0) |
| Presence of C3                                           | 5.6 (-4.0; 15.1)           | 9.8 (-12.9; 32.5)     | 2.4 (-14.3; 19.1)       | 1.0 (-20.3; 22.3)          | 8.4 (-10.7; 27.5)  |
| Presence of C1q with or without C3                       | 3.2 (-7.8; 14.2)           | -21.2 (-44.7; 2.4)    | 1.8 (-16.3; 19.9)       | 11.1 (-9.8; 31.9)          | -5.4 (-28.7; 17.8) |
| Presence of C3 only                                      | -3.2 (-14.2; 7.8)          | 21.2 (-2.4; 44.7)     | -1.8 (-19.9; 16.3)      | -11.1 (-31.9; 9.8)         | 5.4 (-17.8; 28.7)  |

<sup>a</sup> Estimates of change in eGFR over a year after biopsy given in ml/min/1.73 m<sup>2</sup> with 95% confidence intervals as dependent on the presence of deposits with the absence of deposits as the reference and as dependent on the intensity of the deposits on a scale from 0 to 4 with 0 as the reference.

**Supplementary Table S4B. Change in estimated glomerular filtration rate over a year and renal deposits of complement factors**

|                                                      | All                      | Class II            | Class III         | Class IV                   | Class V           |
|------------------------------------------------------|--------------------------|---------------------|-------------------|----------------------------|-------------------|
| Number of patients, <i>n</i>                         | 135                      | 18                  | 37                | 47                         | 33                |
| Patients with decline in eGFR, %                     | 48.9                     | 55.6                | 54.1              | 31.9                       | 63.6              |
| <b>Odds ratios for a decline in eGFR<sup>a</sup></b> |                          |                     |                   |                            |                   |
| Glomerular deposits                                  |                          |                     |                   |                            |                   |
| Presence of C1q                                      | <b>0.28 (0.11-0.69)</b>  | 0.10 (0.01-1.10)    | 0.31 (0.05-1.81)  | 0.28 (0.05-1.48)           | 0.64 (0.10-3.95)  |
| Presence of C3                                       | <b>0.23 (0.06-0.86)</b>  | 0.21 (0.02-2.48)    | 0.25 (0.03-2.49)  | 0.45 (0.03-7.75)           | NA <sup>b</sup>   |
| Intensity of C1q                                     | <b>0.76 (0.57-1.00)</b>  | 0.46 (0.15-1.44)    | 0.78 (0.46-1.33)  | 0.77 (0.46-1.29)           | 1.08 (0.58-1.99)  |
| Intensity of C3                                      | <b>0.57 (0.40-0.80)</b>  | 0.42 (0.16-1.14)    | 0.69 (0.36-1.35)  | 0.79 (0.43-1.46)           | 0.43 (0.18-1.02)  |
| Presence of C1q with or without C3                   | 0.47 (0.17-1.31)         | 0.29 (0.02-4.24)    | 0.47 (0.04-5.73)  | 0.38 (0.07-2.17)           | 0.80 (0.12-5.20)  |
| Presence of C3 only                                  | 2.13 (0.77-5.92)         | 3.50 (0.24-51.90)   | 2.14 (0.17-26.33) | 2.64 (0.46-15.08)          | 1.25 (0.19-8.13)  |
| Tubular deposits                                     |                          |                     |                   |                            |                   |
| Presence of C1q                                      | <b>0.31 (0.11-0.83)</b>  | NA <sup>c</sup>     | 0.81 (0.17-3.89)  | 0.14 (0.02-1.18)           | 0.55 (0.03-9.68)  |
| Presence of C3                                       | 0.76 (0.38-1.50)         | 0.78 (0.04-14.75)   | 1.22 (0.32-4.66)  | 1.37 (0.38-4.94)           | 0.38 (0.09-1.65)  |
| Presence of C1q with or without C3                   | <b>0.28 (0.09-0.84)</b>  | NA <sup>c</sup>     | 0.40 (0.05-3.42)  | <b>0.08 (0.01-0.77)</b>    | 0.88 (0.05-16.74) |
| Presence of C3 only                                  | <b>3.62 (1.19-11.06)</b> | NA <sup>c</sup>     | 2.50 (0.29-21.40) | <b>12.38 (1.29-118.33)</b> | 1.14 (0.06-21.87) |
| Vascular deposits                                    |                          |                     |                   |                            |                   |
| Presence of C1q                                      | 0.97 (0.43-2.20)         | 1.75 (0.13-23.70)   | 1.56 (0.31-7.75)  | 0.55 (0.13-2.39)           | 2.59 (0.25-26.31) |
| Presence of C3                                       | 0.60 (0.28-1.29)         | 0.14 (0.02-1.16)    | 1.63 (0.42-6.36)  | 0.51 (0.11-2.26)           | 0.64 (0.10-3.95)  |
| Presence of C1q with or without C3                   | 1.14 (0.48-2.73)         | 10.00 (0.40-250.42) | 1.17 (0.21-6.56)  | 0.64 (0.14-2.97)           | 3.00 (0.28-31.63) |
| Presence of C3 only                                  | 0.87 (0.37-2.08)         | 0.10 (0.00-2.50)    | 0.86 (0.15-4.82)  | 1.57 (0.34-7.32)           | 0.33 (0.03-3.51)  |

<sup>a</sup> Odds ratios for a decline in eGFR over a year after biopsy with 95% confidence intervals as dependent on the presence of deposits with the absence of deposits as the reference and as dependent on the intensity of the deposits on a scale from 0 to 4 with 0 as the reference. <sup>b</sup> Could not be calculated as all patients without these deposits had a decline in eGFR. <sup>c</sup> Could not be calculated as no patients with these deposits had a decline in eGFR.

**Supplementary Table S5. Hazard ratios for end-stage renal disease and death and renal deposits of complement factors**

|                                                   | All              | Class II          | Class III         | Class IV                | Class V           |
|---------------------------------------------------|------------------|-------------------|-------------------|-------------------------|-------------------|
| Number of patients, <i>n</i>                      | 183              | 21                | 47                | 69                      | 46                |
| Patients with end-stage renal disease or death, % | 26.8             | 14.3              | 21.3              | 39.1                    | 19.6              |
| Patients with end-stage renal disease, %          | 24.6             | 9.5               | 21.3              | 37.7                    | 15.2              |
| Patients with death, %                            | 7.7              | 4.8               | 0.0               | 13.0                    | 8.7               |
| Follow-up, median (iqr), years                    | 7.5 (3.0-11.4)   | 7.3 (4.6-10.0)    | 8.8 (4.5-11.3)    | 5.9 (2.1-11.7)          | 8.0 (3.1-11.4)    |
| <b>Hazard ratios (95%CI)<sup>a</sup></b>          |                  |                   |                   |                         |                   |
| Glomerular deposits                               |                  |                   |                   |                         |                   |
| Presence of C1q                                   | 0.88 (0.46-1.67) | 0.51 (0.05-5.61)  | 0.43 (0.12-1.58)  | 0.93 (0.37-2.34)        | 1.66 (0.20-13.58) |
| Presence of C3                                    | 0.86 (0.38-1.92) | NA <sup>b</sup>   | 0.73 (0.15-3.67)  | <b>0.29 (0.11-0.78)</b> | NA <sup>b</sup>   |
| Intensity of C1q                                  | 0.99 (0.79-1.24) | 0.50 (0.07-3.60)  | 0.71 (0.41-1.21)  | 0.89 (0.66-1.20)        | 1.61 (0.86-3.00)  |
| Intensity of C3                                   | 0.91 (0.71-1.15) | 0.94 (0.36-2.47)  | 0.85 (0.48-1.52)  | <b>0.69 (0.50-0.94)</b> | 1.44 (0.67-3.11)  |
| Presence of C1q with or without C3                | 0.82 (0.38-1.78) | 0.20 (0.02-2.24)  | 0.26 (0.05-1.31)  | 1.42 (0.42-4.83)        | 1.42 (0.17-11.59) |
| Presence of C3 only                               | 1.22 (0.56-2.64) | 4.96 (0.45-55.05) | 3.82 (0.76-19.13) | 0.71 (0.21-2.40)        | 0.70 (0.09-5.75)  |
| Tubular deposits                                  |                  |                   |                   |                         |                   |
| Presence of C1q                                   | 1.20 (0.58-2.49) | NA <sup>c</sup>   | 0.46 (0.06-3.66)  | 1.02 (0.42-2.44)        | 2.12 (0.25-18.16) |
| Presence of C3                                    | 0.98 (0.55-1.72) | NA <sup>c</sup>   | 0.57 (0.12-2.70)  | 0.84 (0.39-1.79)        | 0.77 (0.19-3.09)  |
| Presence of C1q with or without C3                | 1.32 (0.55-3.17) | NA <sup>c</sup>   | 0.84 (0.05-13.49) | 1.09 (0.39-3.10)        | 3.02 (0.27-33.41) |
| Presence of C3 only                               | 0.76 (0.32-1.81) | NA <sup>c</sup>   | 1.19 (0.07-18.98) | 0.91 (0.32-2.59)        | 0.33 (0.03-3.66)  |
| Vascular deposits                                 |                  |                   |                   |                         |                   |
| Presence of C1q                                   | 0.86 (0.40-1.84) | 4.36 (0.38-49.92) | 1.04 (0.22-4.91)  | 0.60 (0.20-1.75)        | 0.72 (0.09-5.89)  |
| Presence of C3                                    | 0.91 (0.49-1.67) | NA <sup>b</sup>   | 0.73 (0.21-2.61)  | 0.59 (0.26-1.33)        | 0.84 (0.17-4.17)  |
| Presence of C1q with or without C3                | 0.87 (0.39-1.94) | 2.35 (0.20-27.23) | 1.29 (0.24-7.08)  | 0.73 (0.24-2.28)        | 0.65 (0.08-5.37)  |
| Presence of C3 only                               | 1.14 (0.52-2.54) | 0.43 (0.04-4.95)  | 0.77 (0.14-4.25)  | 1.37 (0.44-4.25)        | 1.55 (0.19-12.91) |

<sup>a</sup> For the composite outcome of end-stage renal disease and death as dependent on the presence of deposits with the absence of deposits as the reference and as dependent on the intensity of the deposits on a scale from 0 to 4 with 0 as the reference. <sup>b</sup> Could not be calculated as no patients without these deposits reached the composite outcome. <sup>c</sup> Could not be calculated as no patients with these deposits reached the composite outcome.
